# Supplementary material
Source: publisher figshare collection journal article supplement (https://frontiersin.figshare.com/ndownloader/files/14965052)
Supplement: Supplementary file [file 14965052]

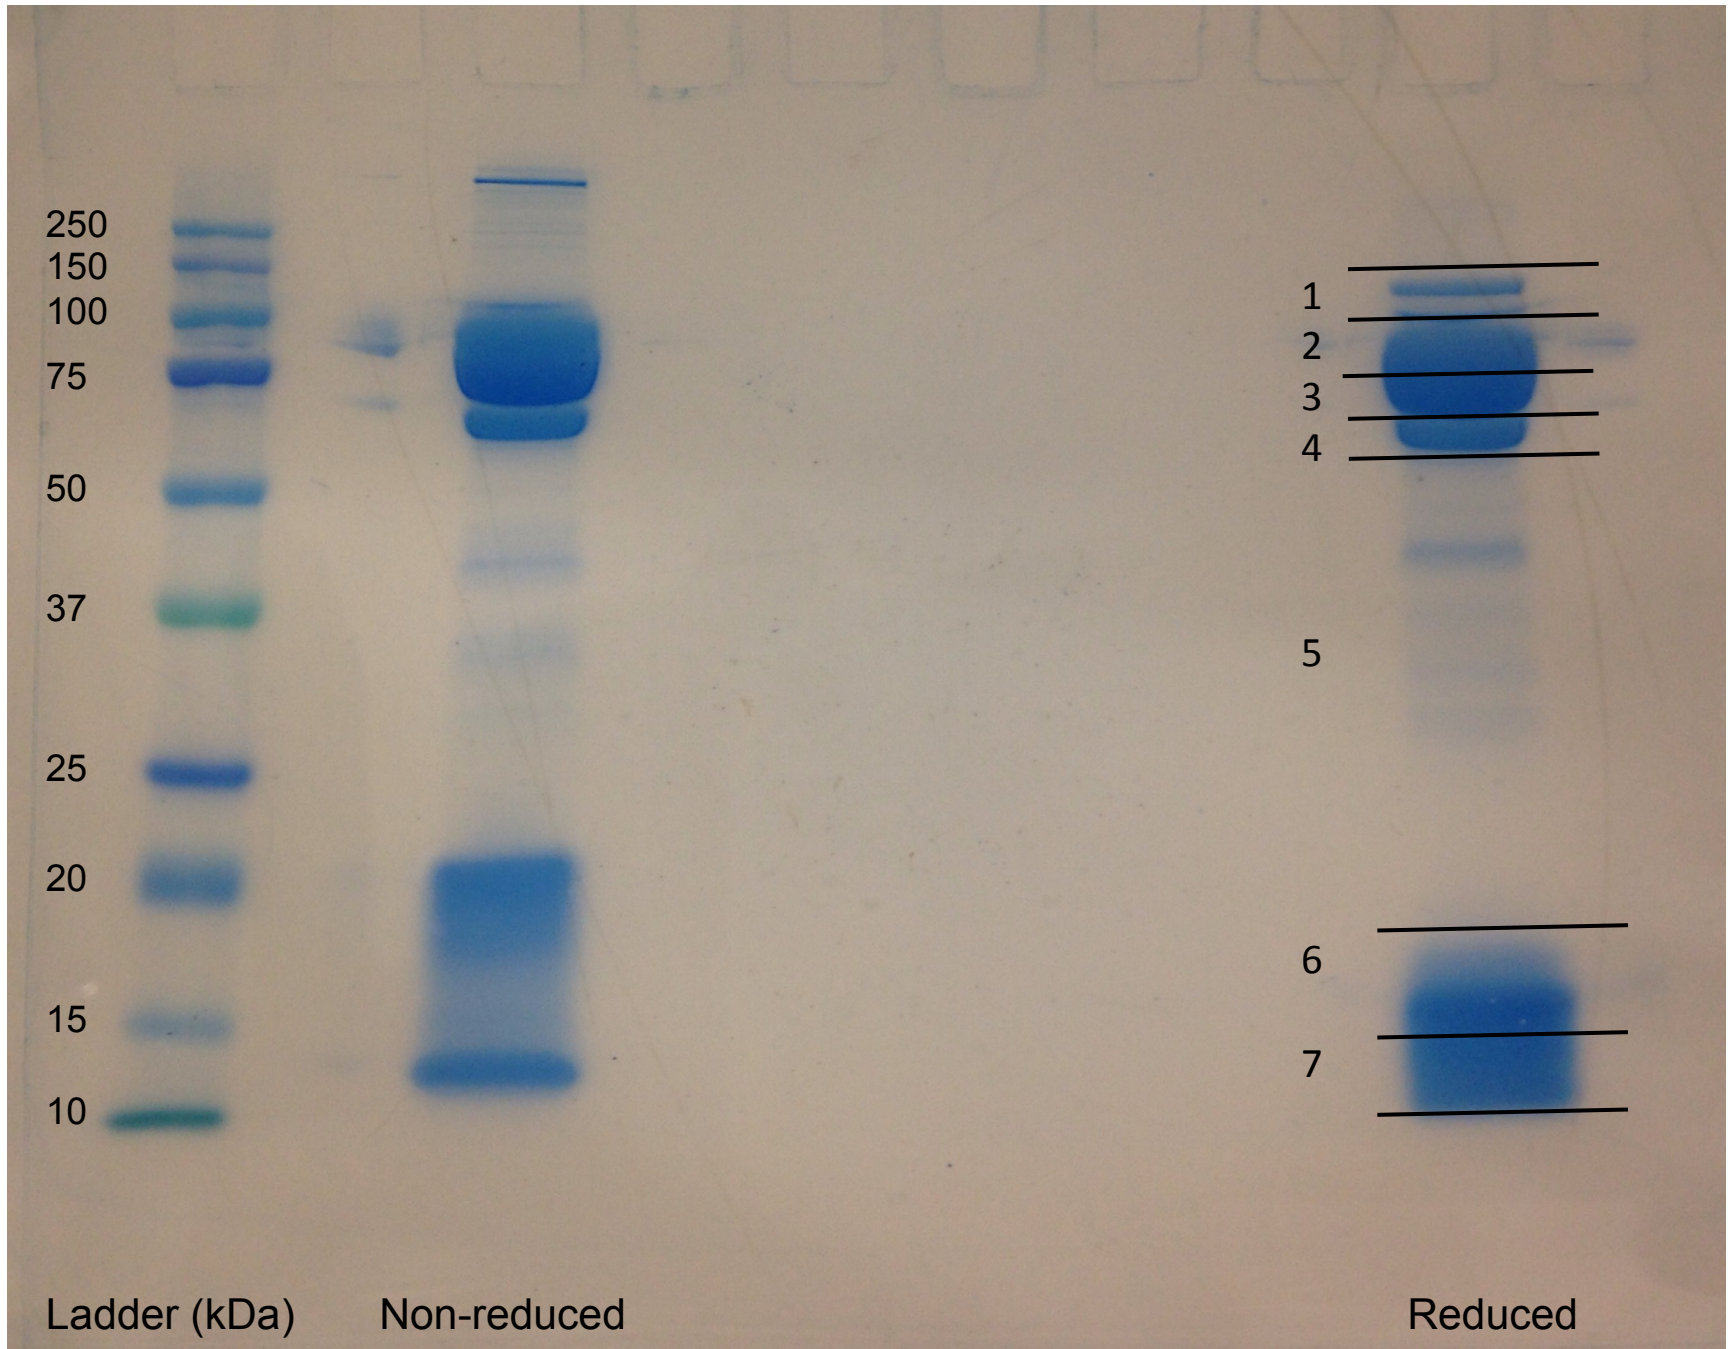

Figure S1. SDS PAGE gel loaded with 16 ug venom protein. Lines delineate numbered gel slices isolated for MS.
